# Supplementary material for: Multi-Input Logic-in-Memory for Ultra-Low Power Non-Von Neumann Computing
Source: Micromachines (Basel). 2021 Oct 14;12(10):1243. doi: 10.3390/mi12101243 (PMC8538894; doi:10.3390/mi12101243)
Supplement: Supplementary file 1 [file micromachines-12-01243-s001.zip › micromachines-1394142-supplementary.pdf]

# Multi-input Logic-in-Memory for Ultra-Low Power non-von Neumann Computing

Tommaso Zanotti <sup>1,\*</sup>, Paolo Pavan <sup>1</sup> and Francesco Maria Puglisi <sup>1</sup>

<sup>1</sup> Dipartimento di Ingegneria "Enzo Ferrari", Università di Modena e Reggio Emilia, Via P. Vivarelli 10/1, 6 41125 Modena, Italy; francescomaria.puglisi@unimore.it (F.M.P.); paolo.pavan@unimore.it (P.P.)

\* Correspondence: tommaso.zanotti@unimore.it;

| # Step | Operation                                                    | Equivalent Operation                                            | # Step | Operation                                                     | Equivalent Operation                                     |
|--------|--------------------------------------------------------------|-----------------------------------------------------------------|--------|---------------------------------------------------------------|----------------------------------------------------------|
| 1-4    | FALSE (C, M <sub>1</sub> , M <sub>2</sub> , M <sub>3</sub> ) | C = M <sub>1</sub> = M <sub>2</sub> = M <sub>3</sub> = 0        | 1-4    | sFALSE (C, M <sub>1</sub> , M <sub>2</sub> , M <sub>3</sub> ) | C = M <sub>1</sub> = M <sub>2</sub> = M <sub>3</sub> = 0 |
| 5      | 2-SIMPLY (I, M <sub>1</sub> )                                | M <sub>1</sub> = $\bar{I}$                                      | 5      | 2-SIMPLY (I, M <sub>1</sub> )                                 | M <sub>1</sub> = $\bar{I}$                               |
| 6      | 2-SIMPLY (S <sub>0</sub> , M <sub>2</sub> )                  | M <sub>2</sub> = $\bar{S}_0$                                    | 6      | 2-SIMPLY (S <sub>0</sub> , M <sub>2</sub> )                   | M <sub>2</sub> = $\bar{S}_0$                             |
| 7      | 2-SIMPLY (S <sub>0</sub> , M <sub>1</sub> )                  | M <sub>1</sub> = $\bar{S}_0 \bar{I}$                            | 7      | 3-SIMPLY (M <sub>1</sub> , M <sub>2</sub> , C)                | C = S <sub>0</sub> I                                     |
| 8      | 2-SIMPLY (M <sub>2</sub> , I)                                | I = $\bar{S}_0 \bar{I}$                                         | 8      | 2-SIMPLY (M <sub>2</sub> , M <sub>3</sub> )                   | M <sub>3</sub> = S <sub>0</sub>                          |
| 9      | 2-SIMPLY (M <sub>1</sub> , M <sub>3</sub> )                  | M <sub>3</sub> = S <sub>0</sub> I                               | 9      | FALSE (S <sub>0</sub> )                                       | S <sub>0</sub> = 0                                       |
| 10     | 2-SIMPLY (I, M <sub>3</sub> )                                | M <sub>3</sub> = S <sub>0</sub> I + $\bar{S}_0 \bar{I}$         | 10     | 2-SIMPLY (M <sub>2</sub> , I, S <sub>0</sub> )                | S <sub>0</sub> = S <sub>0</sub> $\bar{I}$                |
| 11     | FALSE (S <sub>0</sub> )                                      | S <sub>0</sub> = 0                                              | 11     | 2-SIMPLY (M <sub>3</sub> , M <sub>1</sub> , S <sub>0</sub> )  | S <sub>0</sub> = $\bar{I} \bar{S}_0 + S_0 \bar{I}$       |
| 12     | 2-SIMPLY (M <sub>3</sub> , S <sub>0</sub> )                  | S <sub>0</sub> = S <sub>0</sub> $\bar{I}$ + $\bar{S}_0 \bar{I}$ |        |                                                               |                                                          |
| 13     | 2-SIMPLY (M <sub>1</sub> , C)                                | C = S <sub>0</sub> I                                            |        |                                                               |                                                          |

(a)

(b)

**Figure S1.** 1-bit HA sequence of computing steps using (a) 2-SIMPLY only and, (b) up to 3-SIMPLY. The use of 3-SIMPLY reduces the number of computing steps from 13 to 11.

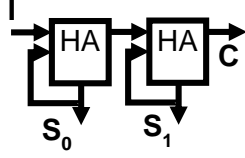

| # Step | Operation                                                                                       | Equivalent Operation                                  |
|--------|-------------------------------------------------------------------------------------------------|-------------------------------------------------------|
| 1-6    | sFALSE (C, M <sub>1</sub> , M <sub>2</sub> , M <sub>3</sub> , M <sub>4</sub> , M <sub>5</sub> ) | $C = M_1 = M_2 = M_3 = M_4 = M_5 = 0$                 |
| 7      | 2-SIMPLY (I, M <sub>1</sub> )                                                                   | $M_1 = \bar{I}$                                       |
| 8      | 2-SIMPLY (S <sub>0</sub> , M <sub>2</sub> )                                                     | $M_2 = \bar{S}_0$                                     |
| 9      | 2-SIMPLY (S <sub>1</sub> , M <sub>3</sub> )                                                     | $M_3 = \bar{S}_1$                                     |
| 10     | 4-SIMPLY (M <sub>1</sub> , M <sub>2</sub> , M <sub>3</sub> , C)                                 | $C = S_0 S_1 I$                                       |
| 11     | 2-SIMPLY (M <sub>2</sub> , M <sub>4</sub> )                                                     | $M_4 = S_0$                                           |
| 12     | 2-SIMPLY (M <sub>3</sub> , M <sub>5</sub> )                                                     | $M_5 = S_1$                                           |
| 13-14  | sFALSE (S <sub>0</sub> , S <sub>1</sub> )                                                       | $S_0 = S_1 = 0$                                       |
| 15     | 3-SIMPLY (I, M <sub>2</sub> , S <sub>0</sub> )                                                  | $S_0 = \bar{I} S_0$                                   |
| 16     | 3-SIMPLY (M <sub>1</sub> , M <sub>4</sub> , S <sub>0</sub> )                                    | $S_0 = \bar{I} \bar{S}_0 + S_0 \bar{I}$               |
| 17     | 3-SIMPLY (I, M <sub>3</sub> , S <sub>1</sub> )                                                  | $S_1 = S_1 \bar{I}$                                   |
| 18     | 3-SIMPLY (M <sub>4</sub> , M <sub>3</sub> , S <sub>1</sub> )                                    | $S_1 = S_1 \bar{I} + S_1 \bar{S}_0$                   |
| 19     | 4-SIMPLY (M <sub>1</sub> , M <sub>2</sub> , M <sub>4</sub> , S <sub>1</sub> )                   | $S_1 = S_1 \bar{I} + S_1 \bar{S}_0 + I S_0 \bar{S}_1$ |

(a)

(b)

**Figure S2.** 4-SIMPLY-based implementation of two concatenated 1-bit HAs that are used to implement the popcounting operation for BNNs. **(a)** Sketch of the two serially connected half-adders (HAs). **(b)** Sequence of IMPLY and FALSE operations implementing the result of the operation. The use of 4-SIMPLY reduces the number of computing steps from 26 (when using only the 2-SIMPLY Figure S1a) to 19.

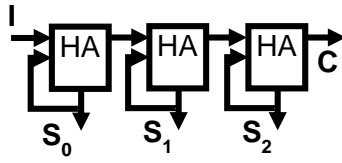

| # Step | Operation                                                                                                                         | Equivalent Operation                                                      |
|--------|-----------------------------------------------------------------------------------------------------------------------------------|---------------------------------------------------------------------------|
| 1-8    | sFALSE (C, M <sub>1</sub> , M <sub>2</sub> , M <sub>3</sub> , M <sub>4</sub> , M <sub>5</sub> , M <sub>6</sub> , M <sub>7</sub> ) | $C = M_1 = M_2 = M_3 = M_4 = M_5 = M_6 = M_7 = 0$                         |
| 9      | 2-SIMPLY (I, M <sub>1</sub> )                                                                                                     | $M_1 = \bar{I}$                                                           |
| 10     | 2-SIMPLY (S <sub>0</sub> , M <sub>2</sub> )                                                                                       | $M_2 = \bar{S}_0$                                                         |
| 11     | 2-SIMPLY (S <sub>1</sub> , M <sub>3</sub> )                                                                                       | $M_3 = \bar{S}_1$                                                         |
| 12     | 2-SIMPLY (S <sub>2</sub> , M <sub>6</sub> )                                                                                       | $M_6 = \bar{S}_2$                                                         |
| 13     | 5-SIMPLY (M <sub>1</sub> , M <sub>2</sub> , M <sub>3</sub> , M <sub>6</sub> , C)                                                  | $C = S_0 S_1 S_2 I$                                                       |
| 14     | 2-SIMPLY (M <sub>2</sub> , M <sub>4</sub> )                                                                                       | $M_4 = S_0$                                                               |
| 15     | 2-SIMPLY (M <sub>3</sub> , M <sub>5</sub> )                                                                                       | $M_5 = S_1$                                                               |
| 16     | 2-SIMPLY (M <sub>6</sub> , M <sub>7</sub> )                                                                                       | $M_7 = S_2$                                                               |
| 17-19  | sFALSE (S <sub>0</sub> , S <sub>1</sub> , S <sub>2</sub> )                                                                        | $S_0 = S_1 = S_2 = 0$                                                     |
| 20     | 3-SIMPLY (I, M <sub>2</sub> , S <sub>0</sub> )                                                                                    | $S_0 = S_0 I$                                                             |
| 21     | 3-SIMPLY (M <sub>1</sub> , M <sub>4</sub> , S <sub>0</sub> )                                                                      | $S_0 = \bar{I} S_0 + S_0 \bar{I}$                                         |
| 22     | 3-SIMPLY (I, M <sub>3</sub> , S <sub>1</sub> )                                                                                    | $S_1 = S_1 \bar{I}$                                                       |
| 23     | 3-SIMPLY (M <sub>4</sub> , M <sub>5</sub> , S <sub>1</sub> )                                                                      | $S_1 = S_1 \bar{I} + S_1 \bar{S}_0$                                       |
| 24     | 4-SIMPLY (M <sub>1</sub> , M <sub>2</sub> , M <sub>4</sub> , S <sub>1</sub> )                                                     | $S_1 = S_1 \bar{I} + S_1 \bar{S}_0 + I S_0 \bar{S}_1$                     |
| 25     | 3-SIMPLY (M <sub>5</sub> , M <sub>2</sub> , S <sub>2</sub> )                                                                      | $S_2 = S_0 \bar{S}_1$                                                     |
| 26     | 3-SIMPLY (I, M <sub>6</sub> , S <sub>2</sub> )                                                                                    | $S_2 = S_0 \bar{S}_1 + \bar{I} S_2$                                       |
| 27     | 3-SIMPLY (M <sub>6</sub> , M <sub>4</sub> , S <sub>2</sub> )                                                                      | $S_2 = S_0 \bar{S}_1 + \bar{I} S_2 + S_2 \bar{S}_0$                       |
| 28     | 5-SIMPLY (M <sub>1</sub> , M <sub>2</sub> , M <sub>3</sub> , M <sub>7</sub> , S <sub>2</sub> )                                    | $S_2 = S_0 \bar{S}_1 + \bar{I} S_2 + S_2 \bar{S}_0 + I S_0 S_1 \bar{S}_2$ |

(a)

(b)

**Figure S3.** 5-SIMPLY-based implementation of three concatenated 1-bit HAs that are used to implement the popcounting operation for BNNs. (a) Sketch of the three serially connected half-adders (HAs). (b) Sequence of IMPLY and FALSE operations implementing the result of the operation. The use of 5-SIMPLY reduces the number of computing steps from 39 (when using only the 2-SIMPLY Figure S1a) to 28.

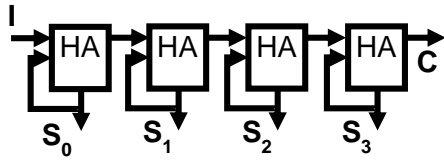

(a)

| # Step | Operation                                                                                                                                                           | Equivalent Operation                                                                                      |
|--------|---------------------------------------------------------------------------------------------------------------------------------------------------------------------|-----------------------------------------------------------------------------------------------------------|
| 1-10   | sFALSE (C, M <sub>1</sub> , M <sub>2</sub> , M <sub>3</sub> , M <sub>4</sub> , M <sub>5</sub> , M <sub>6</sub> , M <sub>7</sub> , M <sub>8</sub> , M <sub>9</sub> ) | $C = M_1 = M_2 = M_3 = M_4 = M_5 = M_6 = M_7 = M_8 = M_9 = 0$                                             |
| 11     | 2-SIMPLY (I, M <sub>1</sub> )                                                                                                                                       | $M_1 = \bar{I}$                                                                                           |
| 12     | 2-SIMPLY (S <sub>0</sub> , M <sub>2</sub> )                                                                                                                         | $M_2 = \bar{S}_0$                                                                                         |
| 13     | 2-SIMPLY (S <sub>1</sub> , M <sub>3</sub> )                                                                                                                         | $M_3 = \bar{S}_1$                                                                                         |
| 14     | 2-SIMPLY (S <sub>2</sub> , M <sub>6</sub> )                                                                                                                         | $M_6 = \bar{S}_2$                                                                                         |
| 15     | 2-SIMPLY (S <sub>3</sub> , M <sub>8</sub> )                                                                                                                         | $M_8 = \bar{S}_3$                                                                                         |
| 16     | 6-SIMPLY (M <sub>8</sub> , M <sub>1</sub> , M <sub>2</sub> , M <sub>3</sub> , M <sub>6</sub> , C)                                                                   | $C = S_0 S_1 S_2 S_3 I$                                                                                   |
| 17     | 2-SIMPLY (M <sub>2</sub> , M <sub>4</sub> )                                                                                                                         | $M_4 = S_0$                                                                                               |
| 18     | 2-SIMPLY (M <sub>3</sub> , M <sub>5</sub> )                                                                                                                         | $M_5 = S_1$                                                                                               |
| 19     | 2-SIMPLY (M <sub>6</sub> , M <sub>7</sub> )                                                                                                                         | $M_7 = S_2$                                                                                               |
| 20     | 2-SIMPLY (M <sub>8</sub> , M <sub>9</sub> )                                                                                                                         | $M_9 = S_3$                                                                                               |
| 21-24  | sFALSE (S <sub>0</sub> , S <sub>1</sub> , S <sub>2</sub> , S <sub>3</sub> )                                                                                         | $S_0 = S_1 = S_2 = S_3 = 0$                                                                               |
| 25     | 3-SIMPLY (I, M <sub>2</sub> , S <sub>0</sub> )                                                                                                                      | $S_0 = S_0 I$                                                                                             |
| 26     | 3-SIMPLY (M <sub>1</sub> , M <sub>4</sub> , S <sub>0</sub> )                                                                                                        | $S_0 = \bar{I} S_0 + S_0 \bar{I}$                                                                         |
| 27     | 3-SIMPLY (I, M <sub>3</sub> , S <sub>1</sub> )                                                                                                                      | $S_1 = S_1 \bar{I}$                                                                                       |
| 28     | 3-SIMPLY (M <sub>4</sub> , M <sub>3</sub> , S <sub>1</sub> )                                                                                                        | $S_1 = S_1 \bar{I} + S_1 \bar{S}_0$                                                                       |
| 29     | 4-SIMPLY (M <sub>1</sub> , M <sub>2</sub> , M <sub>4</sub> , S <sub>1</sub> )                                                                                       | $S_1 = S_1 \bar{I} + S_1 \bar{S}_0 + I S_0 \bar{S}_1$                                                     |
| 30     | 3-SIMPLY (M <sub>5</sub> , M <sub>2</sub> , S <sub>2</sub> )                                                                                                        | $S_2 = S_0 \bar{S}_1$                                                                                     |
| 31     | 3-SIMPLY (I, M <sub>6</sub> , S <sub>2</sub> )                                                                                                                      | $S_2 = S_0 \bar{S}_1 + \bar{I} S_2$                                                                       |
| 32     | 3-SIMPLY (M <sub>6</sub> , M <sub>4</sub> , S <sub>2</sub> )                                                                                                        | $S_2 = S_0 \bar{S}_1 + \bar{I} S_2 + S_2 \bar{S}_0$                                                       |
| 33     | 5-SIMPLY (M <sub>1</sub> , M <sub>2</sub> , M <sub>3</sub> , M <sub>7</sub> , S <sub>2</sub> )                                                                      | $S_2 = S_0 \bar{S}_1 + \bar{I} S_2 + S_2 \bar{S}_0 + I S_0 S_1 \bar{S}_2$                                 |
| 34     | 3-SIMPLY (I, M <sub>8</sub> , S <sub>3</sub> )                                                                                                                      | $S_3 = S_3 \bar{I}$                                                                                       |
| 35     | 4-SIMPLY (M <sub>1</sub> , M <sub>7</sub> , M <sub>8</sub> , S <sub>3</sub> )                                                                                       | $S_3 = S_3 \bar{I} + I S_3 \bar{S}_2$                                                                     |
| 36     | 4-SIMPLY (M <sub>1</sub> , M <sub>4</sub> , M <sub>8</sub> , S <sub>3</sub> )                                                                                       | $S_3 = S_3 \bar{I} + I S_3 \bar{S}_2 + I S_3 \bar{S}_0$                                                   |
| 37     | 4-SIMPLY (M <sub>1</sub> , M <sub>5</sub> , M <sub>8</sub> , S <sub>3</sub> )                                                                                       | $S_3 = S_3 \bar{I} + I S_3 \bar{S}_2 + I S_3 \bar{S}_0 + S_3 \bar{I} + I S_3 \bar{S}_2 + I S_3 \bar{S}_1$ |

(b)

**Figure S4.** 6-SIMPLY-based implementation of four concatenated 1-bit HAs that are used to implement the popcounting operation for BNNs. (a) Sketch of the four serially connected half-adders (HAs). (b) Sequence of IMPLY and FALSE operations implementing the result of the operation. The use of 6-SIMPLY reduces the number of computing steps from 52 (when using only the 2-SIMPLY Figure S1a) to 37.

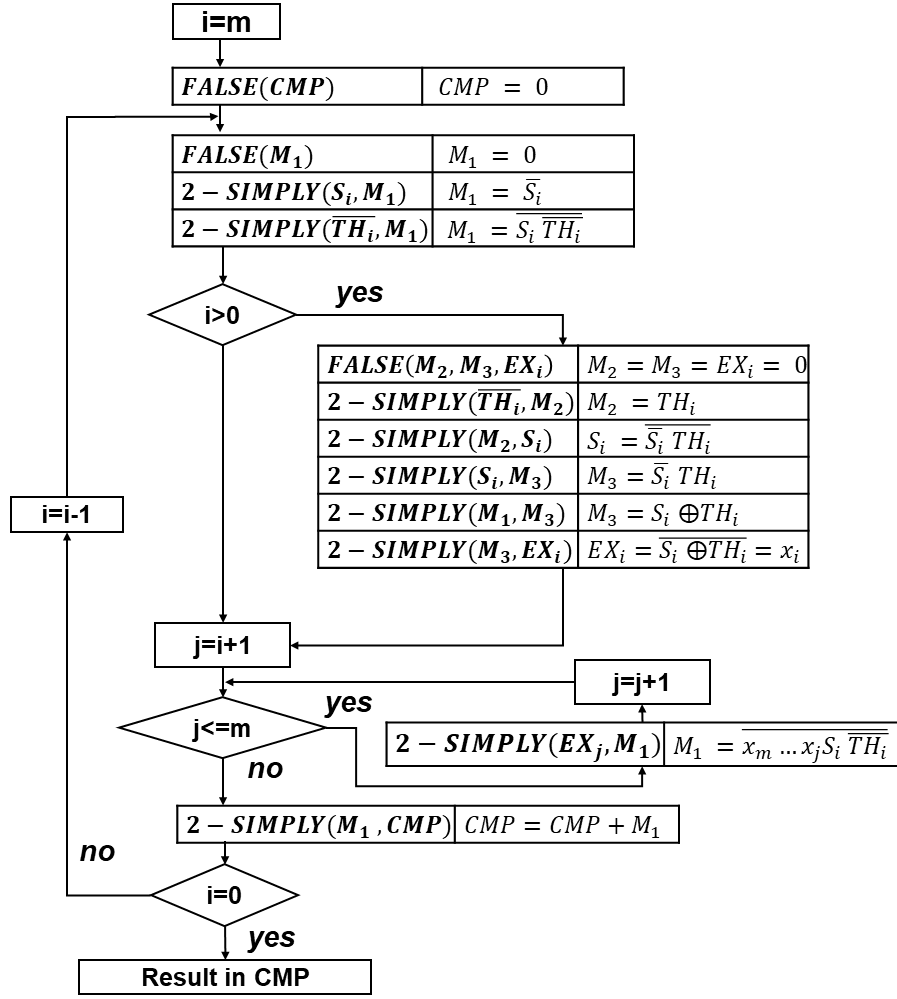

$$CMP = S_m \overline{TH_m} + x_m S_{m-1} \overline{TH_{m-1}} + \dots + x_m \cdot \dots \cdot x_1 S_0 \overline{TH_0}$$

where  $x_m = S_m \oplus TH_m$

$$n = m + 1$$

$$\#Steps = 0.5 n^2 + 11.5n - 7$$

**Figure S5.** Flowchart building the sequence of computing steps required for implementing the activation function of a BNN neuron, i.e., the comparison with a threshold (TH), when using the 2-SIMPLY operation (i.e., 2-SIMPLY-baseline in Figure 11). The formula for the comparison operation is reported together with the scaling of the number of computing steps (i.e., #steps) as a function of the number of compared input bits (n).

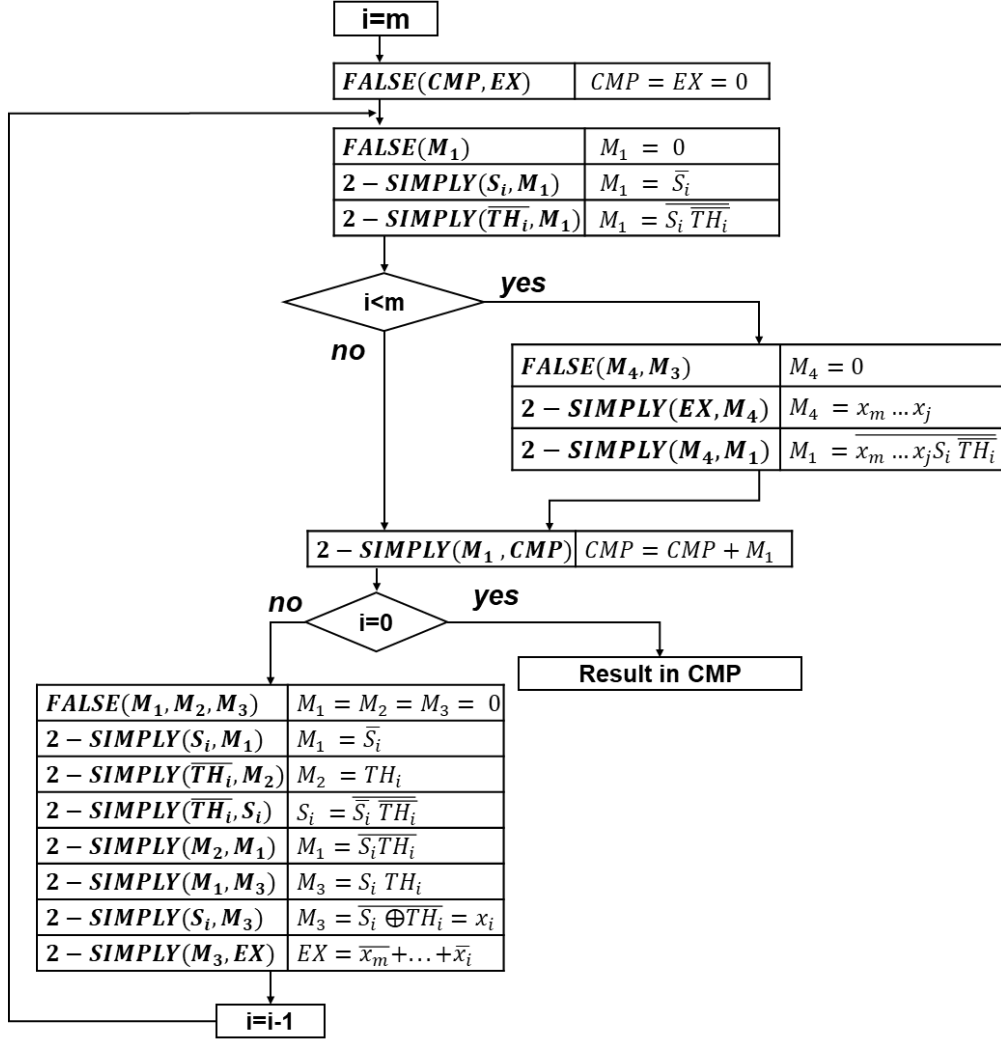

$$n = m + 1$$

if  $n = 1 \rightarrow \#Steps = 5$

else  $\rightarrow \#Steps = 18n - 12$

**Figure S6.** Flowchart building the sequence of computing steps optimized for large number of input bits, that is used to implement the activation function of a BNN neuron, i.e., the comparison with a threshold (TH), when using the 2-SIMPLY operation (i.e., 2-SIMPLY Opt. Wide Words in Figure 11). The formula for the comparison operation is reported together with the scaling of the number of computing steps (i.e., #steps) as a function of the number of compared input bits (n).

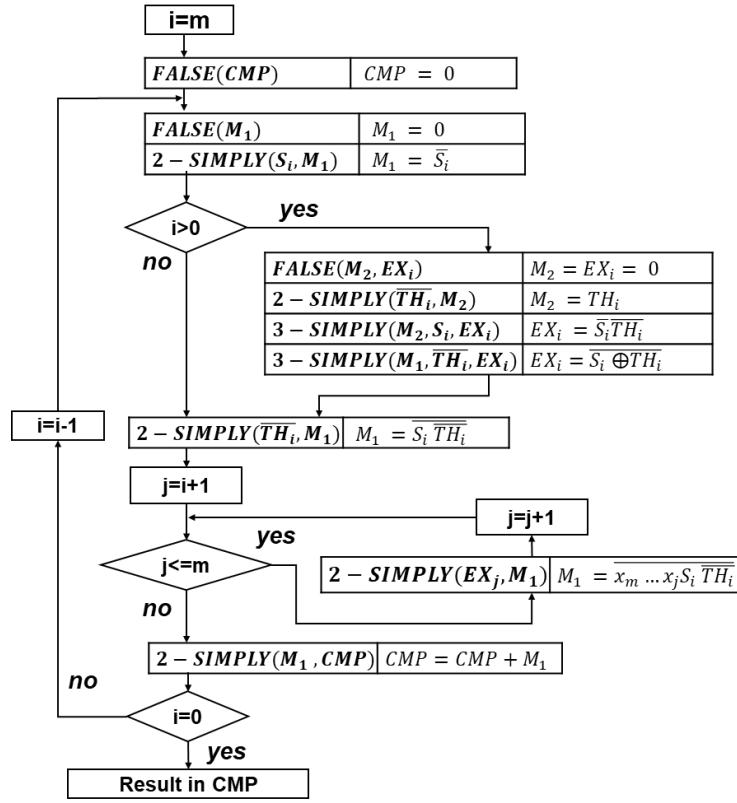

$$n = m + 1$$

$$\#Steps = 0.5 n^2 + 8.5n - 4$$

**Figure S7.** Flowchart building the sequence of computing steps that is used to implement the activation function of a BNN neuron, i.e., the comparison with a threshold (TH), when using the 3-SIMPLY operation and optimizing only the steps required for computing the intermediate XNOR operations (i.e., 3-SIMPLY Only XNOR in Figure 11). The formula for the comparison operation is reported together with the scaling of the number of computing steps (i.e., #steps) as a function of the number of compared input bits (n).

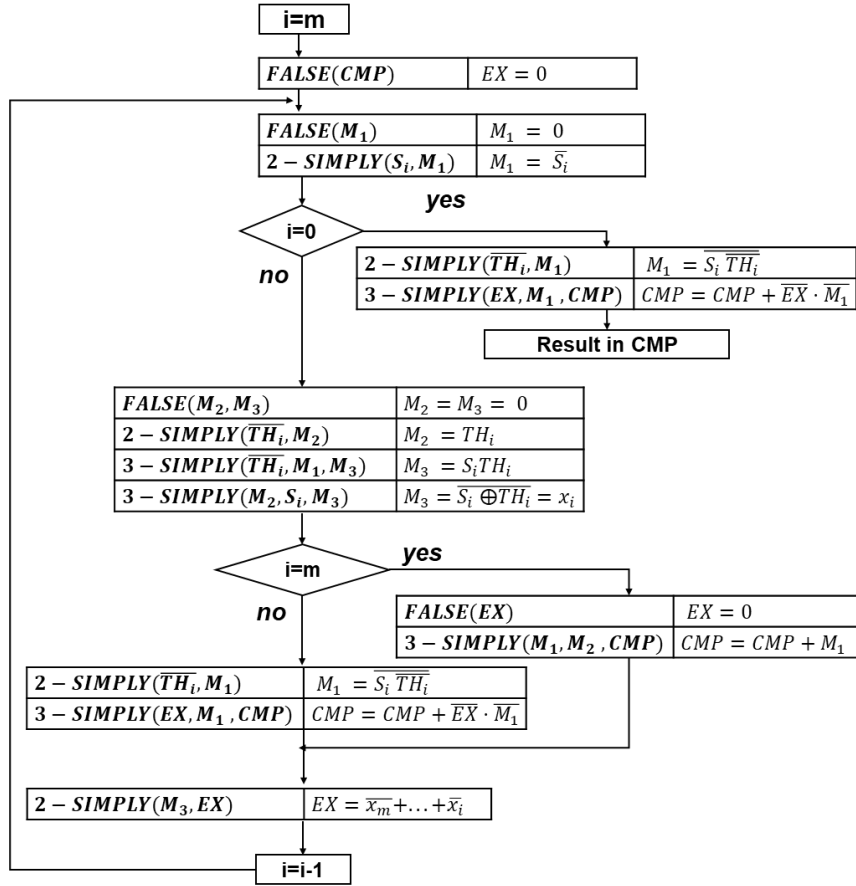

$$n = m + 1$$

$$\text{if } n = 1 \rightarrow \#Steps = 5$$

$$\text{if } n = 2 \rightarrow \#Steps = 15$$

$$\text{else} \rightarrow \#Steps = 10n - 5$$

**Figure S8.** Flowchart building the optimized sequence of computing steps that is used to implement the activation function of a BNN neuron, i.e., the comparison with a threshold (TH), when using the 3-SIMPLY operation (i.e., 3-SIMPLY Opt. in Figure 11). The formula for the comparison operation is reported together with the scaling of the number of computing steps (i.e., #steps) as a function of the number of compared input bits (n).

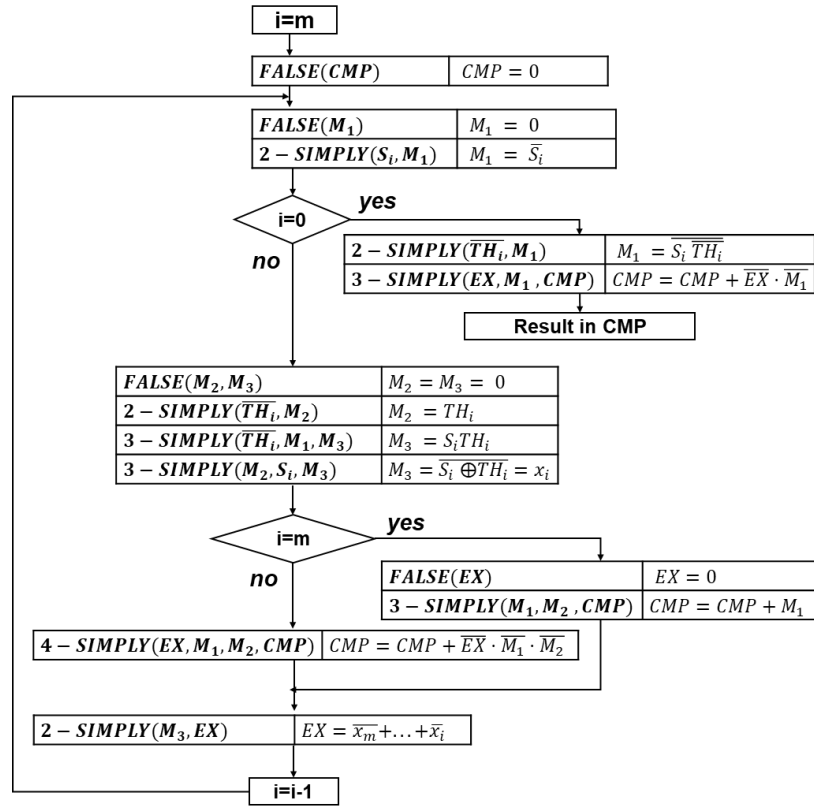

$$n = m + 1$$

$$\text{if } n = 1 \rightarrow \#Steps = 5$$

$$\text{if } n = 2 \rightarrow \#Steps = 15$$

$$\text{else} \rightarrow \#Steps = 9n - 3$$

**Figure S9.** Flowchart building the optimized sequence of computing steps that is used to implement the activation function of a BNN neuron, i.e., the comparison with a threshold (TH), when using the 4-SIMPLY operation (i.e., 4-SIMPLY Opt. in Figure 11). The formula for the comparison operation is reported together with the scaling of the number of computing steps (i.e., #steps) as a function of the number of compared input bits (n).
